# Supplementary material for: A survey of Australian rheumatologists’ perspectives of nutrition needs in systemic sclerosis
Source: PubMed Central journal article supplement (PMC10515988; doi:10.1177/23971983231185465), 2023-07-06
Supplement: sj-pdf-1-jso-10.1177_23971983231185465.pdf [file sj-pdf-1-jso-10.1177_23971983231185465.pdf]

Do you often see patients with pain in the following areas of their body?

- Hands
- Face
- Feet
- Hips
- Knees
- Shoulders
- Back

Do you often see patients with any of the following gastrointestinal issues?

- Reflux
- Difficulty swallowing
- Nausea/vomiting
- Lack of appetite/feeling full quickly
- Heartburn
- Constipation
- Gas
- Diarrhoea
- Bloating
- Small Intestine Bacterial Overgrowth
- Bowel obstruction
- Faecal incontinence
- Other

What other GI issues do you often see in patients?

\_\_\_\_\_

What other symptoms of scleroderma do you see? Please specify.

\_\_\_\_\_

4. How often do you observe weight loss in the Scleroderma patients you treat?

- Never
- Rarely
- Sometimes
- Often
- Always

5. Do most of your patients require any support for cooking and/or shopping?

- Yes
- No

5a. If yes, please specify what support they require for cooking/shopping:

\_\_\_\_\_

5b. What are the common reasons for your patients requiring support with shopping/cooking?

\_\_\_\_\_

6. Do you regularly see patients avoid any foods and/or follow a special diet because of scleroderma?

- Yes
- No

6a. If yes, please specify which foods/special diet (e.g. gluten free diet, dairy free diet, FODMAP diet, etc):

\_\_\_\_\_

NUTRITION EDUCATION NEEDS

7. Please tick the following boxes corresponding to the type of nutrition information most frequently required by patients with scleroderma in your experience:

- Gaining weight
- Losing weight
- Managing nutrition related scleroderma symptoms
- Special diet information (e.g. texture modified diet or FODMAP diet)
- Managing food intolerances/allergies
- Cooking techniques
- General food knowledge
- Other

7a. What other types of nutrition information do you think are frequently required by patients with scleroderma?

\_\_\_\_\_

8. Do you think a dietitian consult/education would be of benefit to your patients with scleroderma?

- Yes
- No

8a. What mode/s do you believe would be suitable to deliver dietary advice by a dietitian to patients with scleroderma?

- Face to face consultations
- Telephone consultations
- Group education sessions
- Written resources i.e., pamphlets, leaflets, booklets etc
- Online webinars/YouTube videos
- Podcasts
- Telehealth
- Student-led clinics
- Dietitians in GP clinics
- Other

8b. Are there any other modes of nutrition education that may be beneficial to your patients with scleroderma?

\_\_\_\_\_

9. How confident would you feel for University students to provide nutrition education for scleroderma patients (as facilitated by a supervisor)? Please tick:

- Not confident at all
- Slightly confident
- Fairly confident
- Completely confident
- Don't know

10. How often do you believe it is necessary for nutrition education/support to be given to patients with scleroderma?

- At diagnosis
- Fortnightly
- Every month
- Twice yearly
- Whenever symptoms occur/increase/change
- My patients do not need a face to face consultation but access to online resources all the time would be useful
- I do not foresee the need for nutrition education at this time

11. Would you as the health professional find it beneficial to receive education about nutrition for patients with scleroderma?

- Yes
- No

12. Thank you for completing the survey. Please use this space to provide any other comments or questions you may have regarding the survey or upcoming research:

\_\_\_\_\_
